# Supplementary material for: Out-of-Hospital Cardiac Arrests and Outdoor Air Pollution Exposure in Copenhagen, Denmark
Source: PLoS One. 2013 Jan 14;8(1):e53684. doi: 10.1371/journal.pone.0053684 (PMC3544842; doi:10.1371/journal.pone.0053684)
Supplement: File S2 — Supplementary tables. (DOC) [file pone.0053684.s002.doc]

**Table S1. Mean differencea between case days and mean of control days for daily exposure levels**

|  | **Lag0** | **Lag1** | **Lag2** | **Lag3** | **Lag4** | **Lag5** |
| --- | --- | --- | --- | --- | --- | --- |
|  | **Difference (95% CI)** | **Difference (95% CI)** | **Difference (95% CI)** | **Difference (95% CI)** | **Difference (95% CI)** | **Difference (95% CI)** |
| **PM10 (µg/m3)** | -0.04 (-0.39; 0.30) | 0.15 (-0.18; 0.48) | 0.08 (-0.26; 0.42) | 0.30 (-0.03; 0.62) | 0.30 (-0.04; 0.63) | 0.15 (-0.20; 0.49) |
| **PM2.5 (µg/m3)** | -0.11 (-0.34; 0.11) | -0.08 (-0.31; 0.15) | 0.08 (-0.15; 0.31) | 0.20 (-0.03; 0.42) | 0.25 (0.01; 0.48) | -0.02 (-0.24; 0.21) |
| **PM10-2.5 (µg/m3)** | 0.08 (-0.21; 0.36) | 0.15 (-0.09; 0.40) | 0.14 (-0.13; 0.40) | 0.20 (-0.04; 0.45) | 0.17 (-0.10; 0.43) | 0.17 (-0.12; 0.46) |
| **PAC (µm2/m3)** | -5.14 (-10.91; 0.64) | -1.98 (-7.83; 3.87) | -1.71 (-7.64; 4.22) | 1.97 (-4.09; 8.03) | 2.54 (-3.66; 8.75) | 1.35 (-4.50; 7.21) |
| **PVC (µm3/m3)** | -0.27 (-0.55; 0.02) | -0.14 (-0.42; 0.15) | -0.05 (-0.34; 0.24) | 0.12 (-0.17; 0.42) | 0.11 (-0.20; 0.42) | 0.08 (-0.21; 0.37) |
| **PNC (no./cm3)** | -33 (-163; 97) | -32 (-163; 99) | -81 (-215; 52) | -9 (-141; 123) | 51 (-81; 182) | 44 (-90; 179) |
| **NOx (ppb)** | -0.18 (-0.42; 0.06) | 0.02 (-0.22; 0.27) | -0.12 (-0.36; 0.12) | 0.17 (-0.08; 0.41) | 0.10 (-0.14; 0.34) | 0.05 (-0.19; 0.30) |
| **NO2 (ppb)** | -0.10 (-0.25; 0.05) | -0.01 (-0.16; 0.14) | -0.10 (-0.25; 0.05) | 0.07 (-0.08; 0.22) | 0.06 (-0.09; 0.21) | 0.00 (-0.15; 0.15) |
| **O3 (ppb)** | 0.13 (-0.15; 0.40) | 0.18 (-0.09; 0.46) | 0.18 (-0.09; 0.45) | 0.02 (-0.26; 0.30) | -0.15 (-0.42; 0.12) | 0.05 (-0.22; 0.32) |
| **CO (ppm)** | -0.003 (-0.005; 0.000) | -0.001 (-0.004; 0.002) | -0.002 (-0.005; 0.001) | 0.001 (-0.002; 0.004) | 0.003 (0.000; 0.006) | 0.002 (-0.002; 0.005) |
| **Temperature (C)** | -0.04 (-0.13; 0.05) | -0.02 (-0.11; 0.07) | -0.04 (-0.14; 0.05) | -0.03 (-0.12; 0.06) | -0.03 (-0.12; 0.06) | -0.06 (-0.14; 0.03) |
| **Relative humidity (%)** | -0.14 (-0.42; 0.14) | -0.20 (-0.49; 0.09) | -0.01 (-0.30; 0.28) | -0.13 (-0.42; 0.15) | -0.07 (-0.36; 0.21) | 0.03 (-0.25; 0.32) |

aDifferences between case days and control days are calculated by subtracting the average of the level on the associated control days from the case day. The average of these differences for the 4657 OHCA cases is then calculated.

**Table S2. Descriptive statistics for daily PM2.5 and PM10 levels (lag0) on days that out-of-hospital cardiac arrests occurred in Copenhagen.**

|  |  |  |  |  | **Percentiles** | | |  | **Difference between case days and mean control days**  **(95% CI)**c |
| --- | --- | --- | --- | --- | --- | --- | --- | --- | --- |
|  | **No. days** | **No. days missing data** | **Mean** | **SD** | **25th** | **50th** | **75th** | **IQR** |
| **1 May 2002  31 Dec 2010** |  |  |  |  |  |  |  |  |  |
| PM10 TEOM (µg/m3) | 2159a | 389 | 15.28 | 8.73 | 10.54 | 13.47 | 17.62 | 7.09 | -0.06 (-0.41, 0.28) |
| PM10 BA (µg/m3) | 2159a | 151 | 24.69 | 12.09 | 16.75 | 22.60 | 29.60 | 12.85 | -0.25 (-0.69, 0.20) |
| **1 Apr 2008 31 Dec 2010** |  |  |  |  |  |  |  |  |  |
| PM2.5 TEOM (µg/m3) | 675b | 53 | 9.60 | 5.15 | 6.49 | 8.29 | 10.71 | 4.23 | -0.01 (-0.37, 0.34) |
| PM2.5 BA (µg/m3) | 675b | 202 | 12.78 | 7.47 | 7.70 | 11.00 | 16.20 | 8.50 | -0.16 (-0.79, 0.47) |

TEOM: Tapered element oscillating microbalance monitor

BA: Beta attenuation monitor

SD: Standard deviation

IQR: Interquartile range

aOf the 3167 days during the study period, 3606 OHCAs occurred on 2159 days

bOf the 1005 days during the study period, 1117 OHCAs occurred on 675 days

cDifferences between case days and control days are calculated by subtracting the average of the level on the associated control days from the case day. The average of these differences for the 4657 OHCA cases is then calculated.

**Table S3. Association between air pollutants and out-of-hospital cardiac arrests in Copenhagen, expressed as percentage increase in risk (%) and 95% confidence intervals per inter-quartile increase in daily lag0 to lag4 and 2-day cumulative average (1 May 200231 December 2010).**

|  | **PM10 TEOM** | | | | | **PM10 BA** | | | | |
| --- | --- | --- | --- | --- | --- | --- | --- | --- | --- | --- |
|  | **IQR** | **n**a | **%** | **95% CI** | | **IQR** | **n** | **%** | **95% CI** | |
| **Lag0** | 7 | 2962 | -0.1 | -3.8 | 3.6 | 13 | 3311 | -1.9 | -6.6 | 3.1 |
| **Lag1** | 7 | 2969 | 2.2 | -1.6 | 6.0 | 13 | 3312 | 0.8 | -4.1 | 5.8 |
| **Lag2** | 7 | 2977 | 1.4 | -2.2 | 5.1 | 13 | 3314 | 0.9 | -3.9 | 5.9 |
| **Lag3** | 7 | 2974 | **4.8** | **0.7** | **9.0** | 13 | 3302 | **5.2** | **0.1** | **10.5** |
| **Lag4** | 7 | 2978 | **3.8** | **0.1** | **7.6** | 13 | 3309 | 4.2 | -0.6 | 9.2 |
| **CA2** | 6 | 2928 | 0.7 | -2.9 | 4.5 | 12 | 3212 | -0.8 | -6.0 | 4.6 |

TEOM: Tapered element oscillating microbalance monitor

BA: Beta attenuation monitor

aNumber of OHCA cases used in the models, which is less than 3606 due to missing exposure data

**Table S4. Association between air pollutants and out-of-hospital cardiac arrests in Copenhagen, expressed as percentage increase in risk (%) and 95% confidence intervals per inter-quartile increase in daily lag0 to lag4 and 2-day cumulative average (1 April 200831 December 2010).**

|  | **PM2.5 TEOM** | | | | | **PM2.5 BA** | | | | |
| --- | --- | --- | --- | --- | --- | --- | --- | --- | --- | --- |
|  | **IQR** | **n**a | **%** | **95% CI** | | **IQR** | **n** | **%** | **95% CI** | |
| **Lag0** | 4 | 1009 | 0.3 | -5.6 | 6.5 | 9 | 779 | -1.3 | -12.0 | 10.7 |
| **Lag1** | 4 | 1022 | 1.6 | -4.2 | 7.7 | 8 | 800 | 3.0 | -6.9 | 14.0 |
| **Lag2** | 4 | 1023 | 6.1 | 0.2 | 12.2 | 9 | 782 | 4.6 | -7.0 | 17.7 |
| **Lag3** | 4 | 1018 | **7.3** | **1.2** | **13.7** | 9 | 806 | 2.3 | -8.3 | 14.3 |
| **Lag4** | 4 | 1013 | **10.4** | **4.6** | **16.6** | 9 | 803 | 10.7 | -0.5 | 23.1 |
| **CA2** | 4 | 1003 | 0.6 | -6.3 | 8.1 | 8 | 715 | 3.6 | -9.3 | 18.3 |

TEOM: Tapered element oscillating microbalance monitor

BA: Beta attenuation monitor

aNumber of OHCA cases used in the models, which is less than 1117 due to missing exposure data

**Table S5. Spearman correlation coefficients between exposure variables (daily lag0) in Copenhagen (1 May 200231 December 2010).**

|  | **PM10 BA** | **PM2.5 TEOM** | **PM2.5 BA** | **PAC** | **PVC** | **PNC** | **NOx** | **NO2** | **O3** | **CO** | **Temp** | **Rel. hum** |
| --- | --- | --- | --- | --- | --- | --- | --- | --- | --- | --- | --- | --- |
| **PM10 TEOM** | 0.843 | 0.812 | 0.617 | 0.589 | 0.590 | 0.373 | 0.302 | 0.322 | 0.028a | 0.209 | 0.251 | -0.045a |
|  | 1770 | 1682 | 1405 | 386 | 1025 | 1025 | 1717 | 1717 | 1462 | 1676 | 1755 | 1755 |
| **PM10 BA** |  | 0.832 | 0.708 | 0.707 | 0.729 | 0.394 | 0.434 | 0.459 | -0.139 | 0.345 | 0.173 | 0.175 |
|  |  | 1600 | 451 | 1233 | 1233 | 1233 | 1943 | 1943 | 1677 | 1897 | 1972 | 1972 |
| **PM2.5 TEOM** |  |  | 0.773 | 0.759 | 0.788 | 0.338 | 0.368 | 0.397 | -0.107 | 0.371 | 0.038a | 0.160 |
|  |  |  | 458 | 1090 | 1090 | 1090 | 1637 | 1637 | 1650 | 1633 | 1665 | 1665 |
| **PM2.5 BA** |  |  |  | 0.650 | 0.677 | 0.381 | 0.373 | 0.401 | -0.170 | 0.287 | -0.020a | 0.224 |
|  |  |  |  | 278 | 278 | 278 | 474 | 474 | 474 | 457 | 463 | 463 |
| **PAC** |  |  |  |  | 0.975 | 0.691 | 0.491 | 0.530 | -0.200 | 0.476 | -0.048a | 0.240 |
|  |  |  |  |  | 1267 | 1267 | 1252 | 1252 | 1111 | 1242 | 1256 | 1256 |
| **PVC** |  |  |  |  |  | 0.557 | 0.462 | 0.501 | -0.261 | 0.491 | -0.095 | 0.344 |
|  |  |  |  |  |  | 1267 | 1252 | 1252 | 1111 | 1242 | 1256 | 1256 |
| **PNC** |  |  |  |  |  |  | 0.453 | 0.474 | -0.015a | 0.323 | 0.031a | -0.057a |
|  |  |  |  |  |  |  | 1252 | 1252 | 1111 | 1242 | 1256 | 1256 |
| **NOx** |  |  |  |  |  |  |  | 0.983 | -0.548 | 0.539 | -0.108 | 0.247 |
|  |  |  |  |  |  |  |  | 2070 | 1733 | 1987 | 2045 | 2045 |
| **NO2** |  |  |  |  |  |  |  |  | -0.520 | 0.557 | -0.123 | 0.251 |
|  |  |  |  |  |  |  |  |  | 1733 | 1987 | 2045 | 2045 |
| **O3** |  |  |  |  |  |  |  |  |  | -0.476 | 0.362 | -0.654 |
|  |  |  |  |  |  |  |  |  |  | 1695 | 1754 | 1754 |
| **CO** |  |  |  |  |  |  |  |  |  |  | -0.503 | 0.380 |
|  |  |  |  |  |  |  |  |  |  |  | 2003 | 2003 |
| **Temp** |  |  |  |  |  |  |  |  |  |  |  | -0.375 |
|  |  |  |  |  |  |  |  |  |  |  |  | 2101 |

TEOM: Tapered element oscillating microbalance monitor

BA: Beta attenuation monitor

Top value is the Spearman correlation coefficient and the bottom value is the sample size

ap-value > 0.05, otherwise p-value < 0.01

**Table S6. Spearman correlation coefficients between exposure variables (daily lag0) in Copenhagen (1 April 200831 December 2010).**

|  | **PM10 BA** | **PM2.5 TEOM** | **PM2.5 BA** | **PAC** | **PVC** | **PNC** | **NOx** | **NO2** | **O3** | **CO** | **Temp** | **Rel. hum** |
| --- | --- | --- | --- | --- | --- | --- | --- | --- | --- | --- | --- | --- |
| **PM10 TEOM** | 0.834 | 0.839 | 0.617 | 0.583 | 0.573 | 0.410 | 0.223 | 0.249 | 0.137 | 0.006a | 0.339 | -0.163 |
|  | 503 | 520 | 386 | 252 | 252 | 252 | 496 | 496 | 530 | 506 | 526 | 526 |
| **PM10 BA** |  | 0.830 | 0.705 | 0.688 | 0.686 | 0.440 | 0.397 | 0.425 | -0.030a | 0.150 | 0.214 | 0.067a |
|  |  | 580 | 447 | 317 | 317 | 317 | 570 | 570 | 601 | 573 | 586 | 586 |
| **PM2.5 TEOM** |  |  | 0.771 | 0.710 | 0.714 | 0.404 | 0.344 | 0.375 | -0.039a | 0.266 | 0.057a | 0.127 |
|  |  |  | 454 | 323 | 323 | 323 | 587 | 587 | 620 | 600 | 606 | 606 |
| **PM2.5 BA** |  |  |  | 0.653 | 0.679 | 0.381 | 0.372 | 0.399 | -0.175 | 0.284 | -0.020a | 0.227 |
|  |  |  |  | 274 | 274 | 274 | 470 | 470 | 470 | 453 | 459 | 459 |
| **PAC** |  |  |  |  | 0.974 | 0.747 | 0.487 | 0.513 | -0.305 | 0.345 | -0.048a | 0.310 |
|  |  |  |  |  | 324 | 324 | 324 | 324 | 324 | 322 | 314 | 314 |
| **PVC** |  |  |  |  |  | 0.626 | 0.443 | 0.475 | -0.348 | 0.352 | -0.109a | 0.395 |
|  |  |  |  |  |  | 324 | 324 | 324 | 324 | 322 | 314 | 314 |
| **PNC** |  |  |  |  |  |  | 0.509 | 0.515 | -0.123 | 0.246 | 0.133 | 0.003a |
|  |  |  |  |  |  |  | 324 | 324 | 324 | 322 | 314 | 314 |
| **NOx** |  |  |  |  |  |  |  | 0.988 | -0.491 | 0.377 | -0.132 | 0.196 |
|  |  |  |  |  |  |  |  | 618 | 618 | 596 | 602 | 602 |
| **NO2** |  |  |  |  |  |  |  |  | -0.457 | 0.386 | -0.144 | 0.203 |
|  |  |  |  |  |  |  |  |  | 618 | 596 | 602 | 602 |
| **O3** |  |  |  |  |  |  |  |  |  | -0.384 | 0.441 | -0.677 |
|  |  |  |  |  |  |  |  |  |  | 624 | 636 | 636 |
| **CO** |  |  |  |  |  |  |  |  |  |  | -0.520 | 0.321 |
|  |  |  |  |  |  |  |  |  |  |  | 609 | 609 |
| **Temp** |  |  |  |  |  |  |  |  |  |  |  | -0.488 |
|  |  |  |  |  |  |  |  |  |  |  |  | 636 |

TEOM: Tapered element oscillating microbalance monitor

BA: Beta attenuation monitor

Top value is the Spearman correlation coefficient and the bottom value is the sample size

ap-value > 0.05, otherwise p-value < 0.05

**Table S7. Association between PM2.5 and PM10 (also adjusted for O3) and out-of-hospital cardiac arrests in Copenhagen, expressed as percentage increase in risk (%) and 95% confidence intervals per inter-quartile increase in daily lag0 to lag5 and 2-day, 4-day and 6-day cumulative average (1 January 200031 December 2010).**

|  | **PM2.5 adjusted for O3** | | | | | **O3 adjusted for PM2.5** | | | | |
| --- | --- | --- | --- | --- | --- | --- | --- | --- | --- | --- |
|  | **IQR** | **na** | **%** | **95% CI** | | **IQR** | **na** | **%** | **95% CI** | |
| **Lag0** | 5 | 2692 | -1.3 | -5.5 | 3.1 | 14 | 2692 | -1.8 | -11.5 | 9.0 |
| **Lag1** | 5 | 2706 | -0.9 | -5.0 | 3.4 | 14 | 2706 | 1.6 | -8.3 | 12.7 |
| **Lag2** | 5 | 2719 | 2.6 | -1.6 | 7.1 | 13 | 2719 | 6.8 | -3.0 | 17.7 |
| **Lag3** | 5 | 2717 | **4.7** | **0.4** | **9.1** | 14 | 2717 | 0.5 | -9.3 | 11.3 |
| **Lag4** | 5 | 2718 | **4.8** | **0.6** | **9.2** | 14 | 2718 | -5.0 | -14.2 | 5.3 |
| **CA2** | 4 | 2659 | -1.3 | -5.1 | 2.6 | 13 | 2659 | -0.6 | -11.2 | 11.2 |
|  | **PM10 adjusted for O3** | | | | | **O3 adjusted for PM10** | | | | |
|  | **IQR** | **na** | **%** | **95% CI** | | **IQR** | **na** | **%** | **95% CI** | |
| **Lag0** | 7 | 2413 | -0.1 | -4.0 | 4.0 | 13 | 2413 | 1.1 | -8.7 | 11.9 |
| **Lag1** | 6 | 2417 | 0.9 | -2.6 | 4.6 | 13 | 2417 | 3.7 | -6.3 | 14.7 |
| **Lag2** | 7 | 2423 | 2.7 | -1.2 | 6.7 | 13 | 2423 | 8.5 | -2.1 | 20.2 |
| **Lag3** | 7 | 2422 | **5.7** | **1.2** | **10.4** | 13 | 2422 | -4.4 | -13.5 | 5.7 |
| **Lag4** | 7 | 2425 | **4.5** | **0.4** | **8.8** | 13 | 2425 | -5.3 | -14.5 | 4.8 |
| **CA2** | 6 | 2380 | 0.0 | -4.0 | 4.2 | 12 | 2380 | 2.4 | -8.2 | 14.1 |
|  | **PM10-2.5 adjusted for O3** | | | | | **O3 adjusted for PM10-2.5** | | | | |
|  | **IQR** | **na** | **%** | **95% CI** | | **IQR** | **na** | **%** | **95% CI** | |
| **Lag0** | 4 | 2270 | 0.7 | -2.3 | 3.7 | 13 | 2270 | -1.2 | -11.2 | 9.8 |
| **Lag1** | 4 | 2288 | 1.8 | -1.4 | 5.1 | 13 | 2288 | 1.5 | -8.6 | 12.8 |
| **Lag2** | 4 | 2296 | 2.1 | -0.8 | 5.1 | 13 | 2296 | 5.7 | -5.0 | 17.6 |
| **Lag3** | 4 | 2295 | 3.6 | -0.2 | 7.6 | 13 | 2295 | -3.2 | -12.8 | 7.5 |
| **Lag4** | 4 | 2295 | 2.1 | -1.1 | 5.3 | 13 | 2295 | -5.4 | -14.8 | 5.2 |
| **CA2** | 3 | 2235 | 1.2 | -1.6 | 4.0 | 12 | 2235 | -0.6 | -11.2 | 11.3 |

aNumber of OHCA cases used in the models, which is less than 4657 due to missing exposure data
